# Supplementary material for: Preparation and Activity of Hemostatic and Antibacterial Dressings with Greige Cotton/Zeolite Formularies Having Silver and Ascorbic Acid Finishes
Source: MDPI journal article supplement (doi:10.3390/ijms242317115), 2023-12-04
Supplement: s1 [file s1]

# Preparation and Activity of Dressings Designed for Prolonged Field Care Use: Hemostatic and Antibacterial Properties of Greige Cotton/ Zeolite Formularies comparing Silver and Ascorbic Acid Finishes

J. Vincent Edwards<sup>1\*</sup>, Nicolette T. Prevost<sup>1</sup>, Doug Hinchliffe<sup>1</sup>, Sunghyun Nam<sup>1</sup>, SeChin Chang<sup>1</sup>, Rebecca Hron<sup>1</sup>, Crista Madison<sup>1</sup>, Jade Smith<sup>1</sup>, Erika J. Martin<sup>2</sup>, Chelsie N. Poffenberger<sup>3</sup>, Michelle M. Taylor<sup>3</sup> and Kirsty Dixon<sup>3</sup>

- 1 Southern Regional Research Center, United States Department of Agriculture, New Orleans, LA.,70124; vince.edwards@usda.gov; nicolette.prevost@usda.gov, doug.hinchliffe@usda.gov, sunghyun.nam@usda.gov, sechin.chang@usda.gov, rebecca.hron@usda.gov, crista.madison@usda.gov, jade.smith@usda.gov
  - 2 Department of Internal Medicine, School of Medicine, Virginia Commonwealth University, Richmond Virginia, 23298; erika.martin@vcuhealth.org
  - 3 Department of Surgery, School of Medicine, Virginia Commonwealth University, Richmond Virginia, 23298; poffenberger@vcu.edu, taylormm5@vcu.edu, and kirsty.dixon@vcuhealth.org
- \* Correspondence: vince.edwards@usda.gov; Tel.: +1-504-286-4360

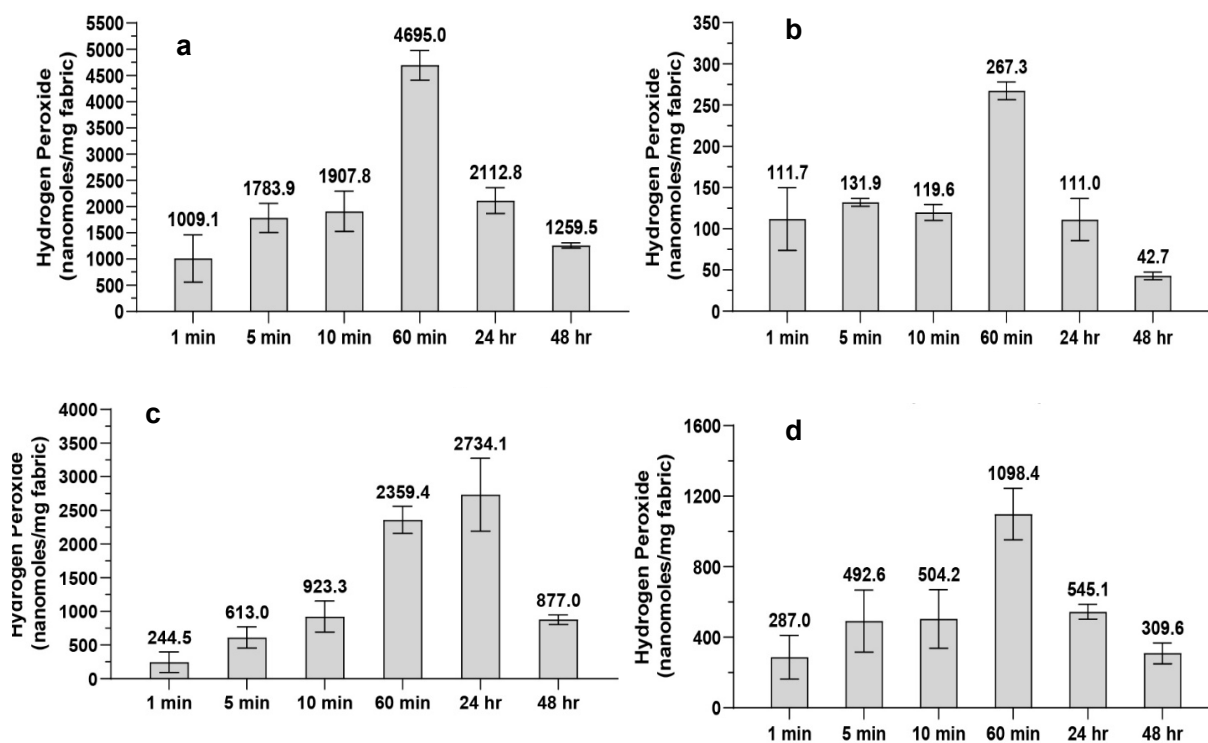

**Figure S1.** The graphs above show (a) BIOGauze (BGz), (b) BIOGauze with zeolite ammonium Y (NH<sub>4</sub>Y), (c) citrate gauze, and (d) citrate gauze with zeolite (NH<sub>4</sub>Y) hydrogen peroxide production (nmoles/mg fabric) over a period of 48 hrs at different time points.

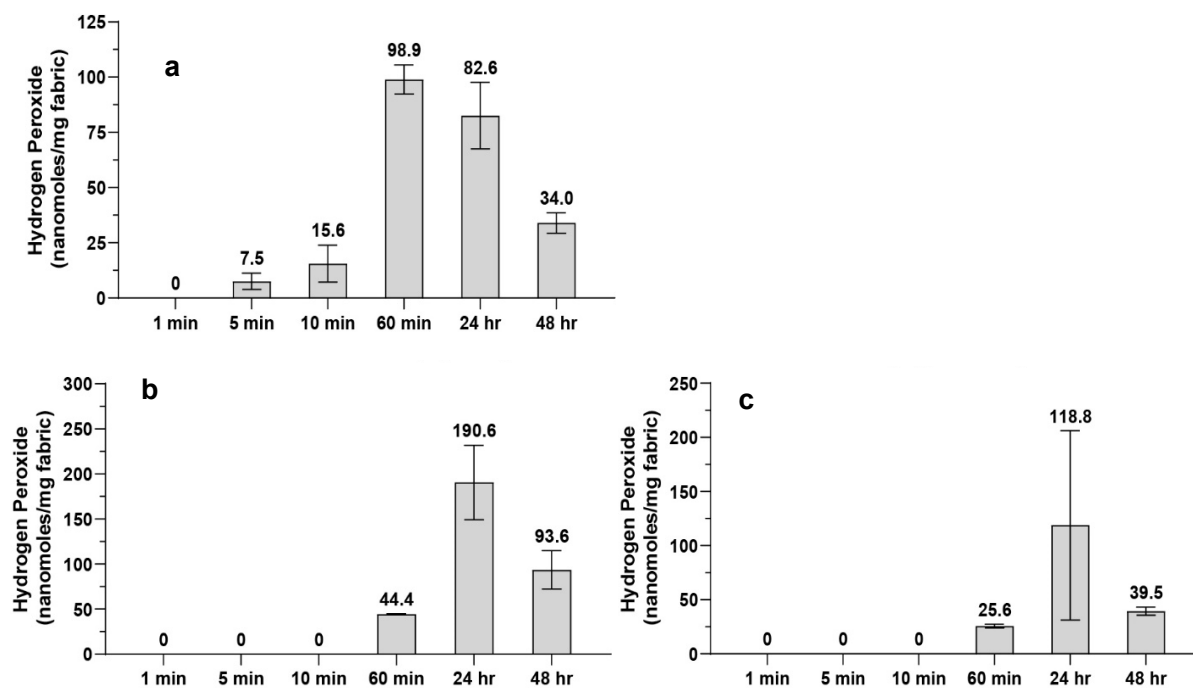

**Figure S2.** The graphs above show (a) TACGauze (TGz), (b) silver TACGauze (AgTGz), and (c) silver TACGauze with zeolite (AgTGz with  $\text{NH}_4\text{Y}$ ) hydrogen peroxide production (nmol/mg fabric) over a period of 48 hrs at different time points.

**Table S1.** One-way ANOVA of R values shown in Figure 6a as determined by one-way ANOVA with Tukey's post hoc test.

| Sample                                                        | Mean Diff. | 95.00% CI of diff. | Summary | Adjusted p value |
|---------------------------------------------------------------|------------|--------------------|---------|------------------|
| Control vs. CG                                                | 18.29      | 14.87 to 21.71     | ****    | <0.0001          |
| Control vs. TGz                                               | 10.28      | 6.856 to 13.69     | ****    | <0.0001          |
| Control vs. NaY                                               | 14.29      | 10.87 to 17.71     | ****    | <0.0001          |
| Control vs. NH <sub>4</sub> Y                                 | 16.01      | 12.59 to 19.43     | ****    | <0.0001          |
| Control vs. NH <sub>4</sub> Y-CaCl <sub>2</sub>               | 16.44      | 13.02 to 19.86     | ****    | <0.0001          |
| Control vs. NaY (S)                                           | 13.78      | 10.36 to 17.19     | ****    | <0.0001          |
| Control vs. NH <sub>4</sub> Y(S)                              | 16.83      | 13.41 to 20.24     | ****    | <0.0001          |
| CG vs. TGz                                                    | -8.017     | -11.44 to -4.598   | ****    | <0.0001          |
| CG vs. NaY                                                    | -4.000     | -7.419 to -0.5809  | *       | 0.0162           |
| CG vs. NH <sub>4</sub> Y                                      | -2.283     | -5.702 to 1.136    | ns      | 0.3443           |
| CG vs. NH <sub>4</sub> Y-CaCl <sub>2</sub>                    | -1.850     | -5.269 to 1.569    | ns      | 0.5852           |
| CG vs. NaY (S)                                                | -4.517     | -7.936 to -1.098   | **      | 0.0059           |
| CG vs. NH <sub>4</sub> Y(S)                                   | -1.467     | -4.886 to 1.952    | ns      | 0.8044           |
| TGz vs. NaY                                                   | 4.017      | 0.5975 to 7.436    | *       | 0.0157           |
| TGz vs. NH <sub>4</sub> Y                                     | 5.733      | 2.314 to 9.152     | ***     | 0.0006           |
| TGz vs. NH <sub>4</sub> Y-CaCl <sub>2</sub>                   | 6.167      | 2.748 to 9.586     | ***     | 0.0002           |
| TGz vs. NaY (S)                                               | 3.500      | 0.08088 to 6.919   | *       | 0.0429           |
| TGz vs. NH <sub>4</sub> Y (S)                                 | 6.550      | 3.131 to 9.969     | ***     | 0.0001           |
| NaY vs. NH <sub>4</sub> Y                                     | 1.717      | -1.702 to 5.136    | ns      | 0.6652           |
| NaY vs. NH <sub>4</sub> Y-CaCl <sub>2</sub>                   | 2.150      | -1.269 to 5.569    | ns      | 0.4123           |
| NaY vs. NaY (S)                                               | -0.5167    | -3.936 to 2.902    | ns      | 0.9993           |
| NaY vs. NH <sub>4</sub> Y(S)                                  | 2.533      | -0.8858 to 5.952   | ns      | 0.2375           |
| NH <sub>4</sub> Y vs. NH <sub>4</sub> Y-CaCl <sub>2</sub>     | 0.4333     | -2.986 to 3.852    | ns      | 0.9998           |
| NH <sub>4</sub> Y vs. NaY (S)                                 | -2.233     | -5.652 to 1.186    | ns      | 0.3690           |
| NH <sub>4</sub> Y vs. NH <sub>4</sub> Y (S)                   | 0.8167     | -2.602 to 4.236    | ns      | 0.9887           |
| NH <sub>4</sub> Y-CaCl <sub>2</sub> vs. NaY(S)                | -2.667     | -6.086 to 0.7525   | ns      | 0.1918           |
| NH <sub>4</sub> Y-CaCl <sub>2</sub> vs. NH <sub>4</sub> Y (S) | 0.3833     | -3.036 to 3.802    | ns      | >0.9999          |
| NaY(S) vs. NH <sub>4</sub> Y (S)                              | 3.050      | -0.3691 to 6.469   | ns      | 0.0990           |

All zeolite formulations applied either by the padded or sprayed (S) method for these swatches contain 0.5% pectin and 2% calcium chloride (CaCl<sub>2</sub>) and either 5% NaY or 10% NH<sub>4</sub>Y. Abbreviations are ns: not significant; combat gauze (CG), sodium Y zeolite (NaY), ammonium Y zeolite (NH<sub>4</sub>Y), TACGauze (TGz), sprayed (S) and samples are padded otherwise. \* p-value <0.05; \*\* p-value <0.01; \*\*\* p-value <0.001; \*\*\*\* p-value <0.0001, as determined by one-way ANOVA with Tukey's post hoc test.

**Table S2.** One-way ANOVA of R values shown in Figure 6b as determined by one-way ANOVA with Tukey's post hoc test.

| Sample                  | Mean<br>Diff. | 95.00% CI of diff. | Summary | Adjusted p value |
|-------------------------|---------------|--------------------|---------|------------------|
| Control vs. TGz         | 3.533         | -1.408 to 8.475    | ns      | 0.2722           |
| Control vs. CXTGz       | 8.417         | 3.475 to 13.36     | ***     | 0.0005           |
| Control vs. BGz         | 4.617         | -0.3251 to 9.558   | ns      | 0.0762           |
| Control vs. AgTGz       | 5.133         | 0.1916 to 10.08    | *       | 0.0388           |
| Control vs. CXTGz + Y   | 10.53         | 5.592 to 15.48     | ****    | <0.0001          |
| Control vs. BGz + Y     | 11.02         | 6.075 to 15.96     | ****    | <0.0001          |
| Control vs. AgTGz + Y   | 10.43         | 5.492 to 15.38     | ****    | <0.0001          |
| TGz vs. CXTGz           | 4.883         | -0.05841 to 9.825  | ns      | 0.054            |
| TGz vs. BGz             | 1.083         | -3.858 to 6.025    | ns      | 0.9931           |
| TGz vs. AgTGz           | 1.6           | -3.342 to 6.542    | ns      | 0.9426           |
| TGz vs. CXTGz + Y       | 7             | 2.058 to 11.94     | **      | 0.0031           |
| TGz vs. BGz + Y         | 7.483         | 2.542 to 12.43     | **      | 0.0016           |
| TGz vs. AgTGz + Y       | 6.9           | 1.958 to 11.84     | **      | 0.0035           |
| CXTGz vs. BGz           | -3.8          | -8.742 to 1.142    | ns      | 0.2039           |
| CXTGz vs. AgTGz         | -3.283        | -8.225 to 1.658    | ns      | 0.35             |
| CXTGz vs. CXTGz + Y     | 2.117         | -2.825 to 7.058    | ns      | 0.8055           |
| CXTGz vs. BGz + Y       | 2.6           | -2.342 to 7.542    | ns      | 0.616            |
| CXTGz vs. AgTGz + Y     | 2.017         | -2.925 to 6.958    | ns      | 0.8389           |
| BGz vs. AgTGz           | 0.5167        | -4.425 to 5.458    | ns      | >0.9999          |
| BGz vs. CXTGz + Y       | 5.917         | 0.9749 to 10.86    | *       | 0.0135           |
| BGz vs. BGz + Y         | 6.4           | 1.458 to 11.34     | **      | 0.007            |
| BGz vs. AgTGz + Y       | 5.817         | 0.8749 to 10.76    | *       | 0.0155           |
| AgTGz vs. CXTGz + Y     | 5.4           | 0.4583 to 10.34    | *       | 0.0272           |
| AgTGz vs. BGz + Y       | 5.883         | 0.9416 to 10.83    | *       | 0.0141           |
| AgTGz vs. AgTGz + Y     | 5.3           | 0.3583 to 10.24    | *       | 0.0311           |
| CXTGz + Y vs. BGz + Y   | 0.4833        | -4.458 to 5.425    | ns      | >0.9999          |
| CXTGz + Y vs. AgTGz + Y | -0.1          | -5.042 to 4.842    | ns      | >0.9999          |
| BGz + Y vs. AgTGz + Y   | -0.5833       | -5.525 to 4.358    | ns      | 0.9999           |

Abbreviations are TACgauze (TGz), BIOgauze (BGz), silver TACgauze (AgTGz), citrate gauze (CXTGz), (Name)+Y = fabric with NH<sub>4</sub>Y zeolite type, see Table 1 in manuscript in the "Materials and Methods" section for the details of the formularies. \* p-value <0.05; \*\* p-value <0.01; \*\*\* p-value <0.001; \*\*\*\* p-value <0.0001, as determined by one-way ANOVA with Tukey's post hoc test, ns= non-significant.
